# Supplementary material
Source: publisher figshare collection journal article supplement (https://frontiersin.figshare.com/ndownloader/files/12270368)
Supplement: Supplementary file [file 12270368]

5

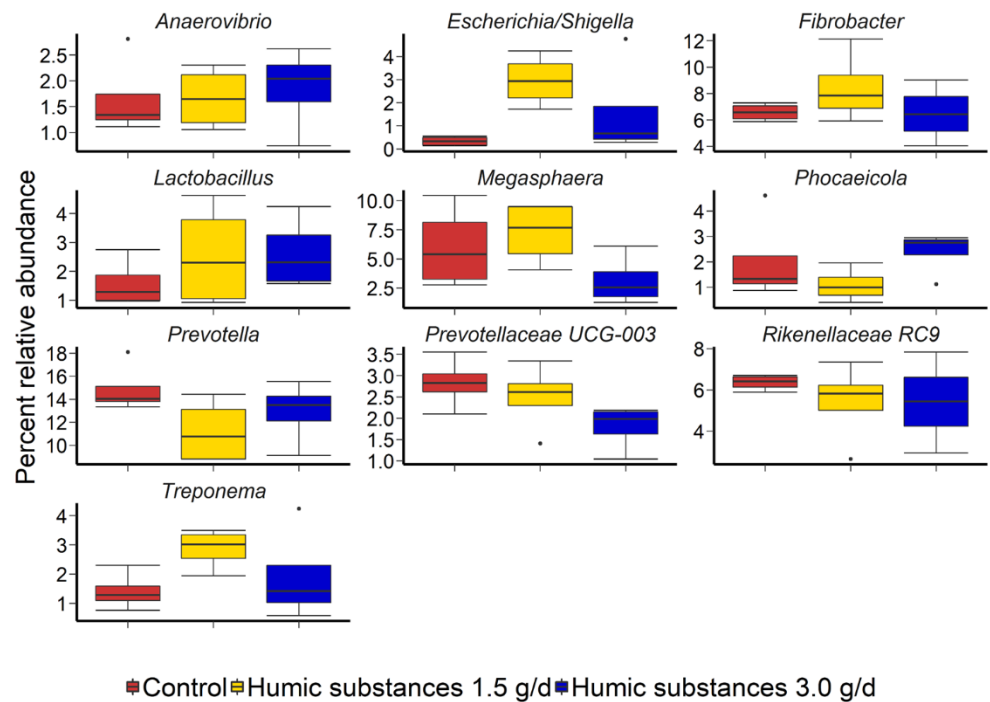

6

■ Control ■ Humic substances 1.5 g/d ■ Humic substances 3.0 g/d

7

**Supplementary Fig. S2.** Relative abundance (%) of the ten most abundant genera in the liquid-

8

associated microbe (LAM) samples by treatment (d 15). Points represent outlier samples.

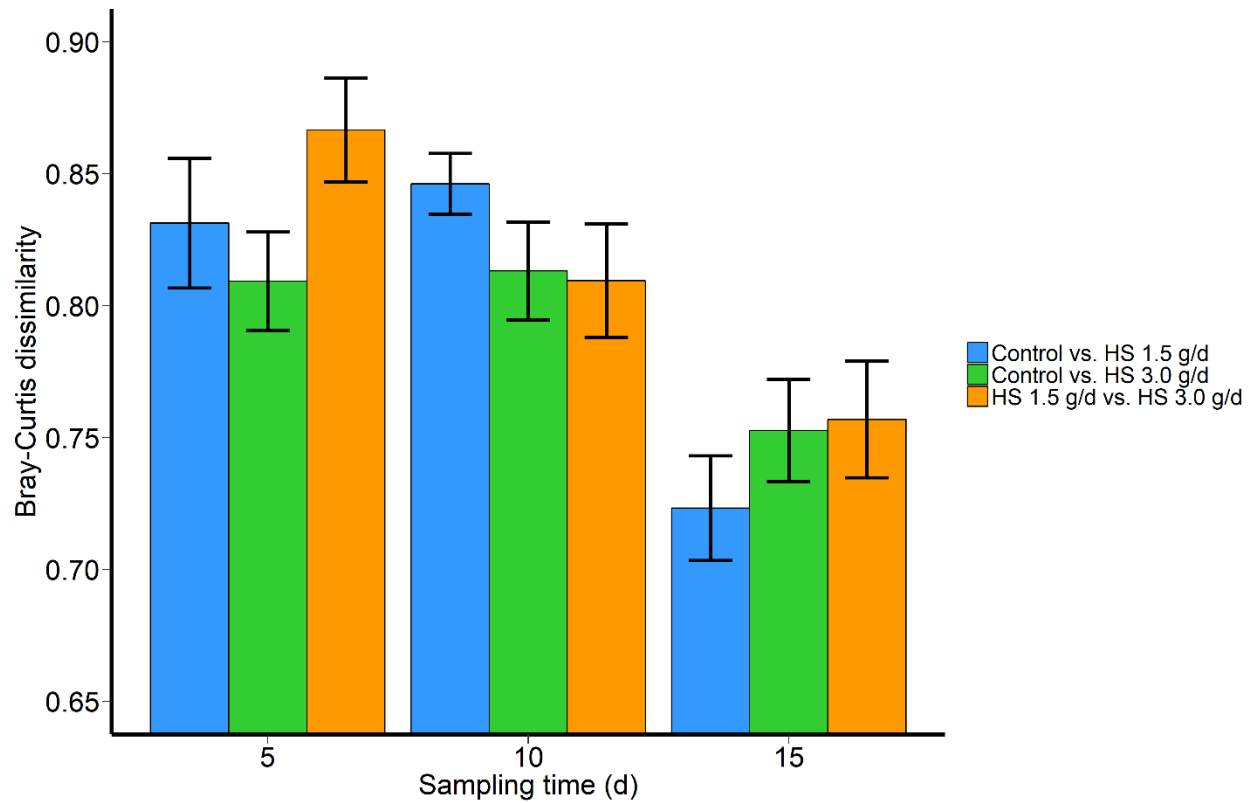

**Supplementary Fig. S3.** Bray-Curtis dissimilarities for pairwise treatment comparisons of solid-associated microbe (SAM) samples by sampling time. Error bars represent standard error of the mean ( $n = 16$  comparisons). HS = humic substances.

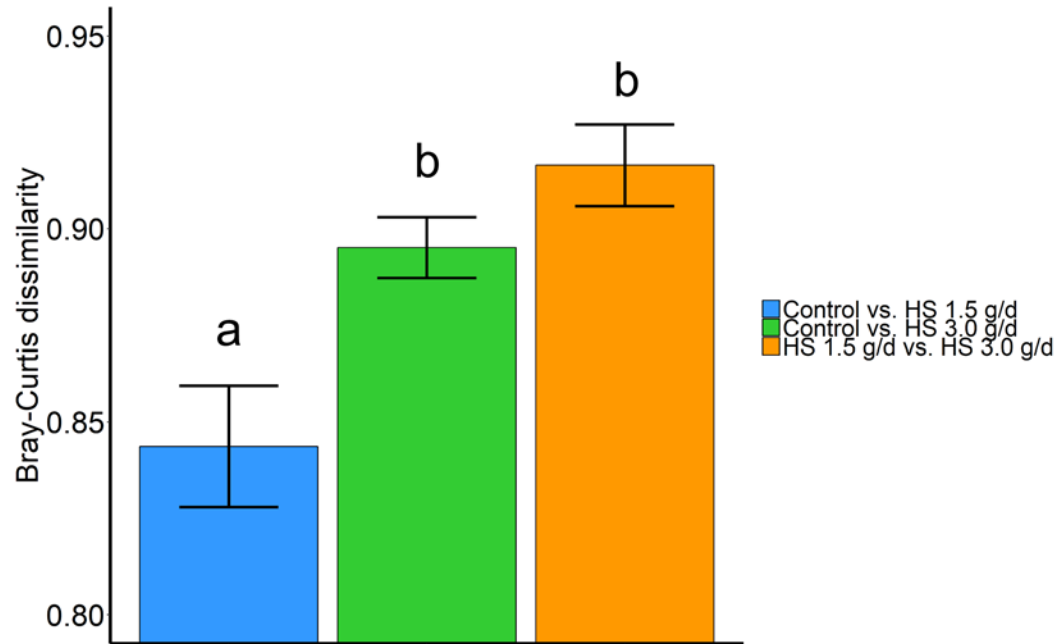

**Supplementary Fig. S4.** Bray-Curtis dissimilarities for pairwise treatment comparisons of liquid-associated microbe (LAM) samples taken at d 15. Error bars represent standard error of the mean ( $n = 16$  comparisons). Different lowercase letters indicate significantly different means ( $P < 0.05$ ). HS = humic substances.
